# Supplementary material for: Maternal bile acid profile and subtype analysis of intrahepatic cholestasis of pregnancy
Source: Research Square preprint supplement (doi:10.21203/rs.3.rs-18812/v2), 2020-12-30
Supplement: Supplementary file 1 [file c034745e01a6828a3e55a0e8.xlsx]

## Sheet: Sheet1
	WEEK	Age	M	H	W	itching	TP	ALB	TBIL	DBIL	IBIL	TBA	ALT	AST	ALP	γ-GGT	LDH	CHE	5'-核苷酸酶	甘胆酸	治疗	ICPhistory	诊断	Gravidity	分娩方式顺1剖2	gestational age at delivery	早产	BW	NICU	meconium-staining amniotic fluid	Apgar Score＜7 at min 1（n）	bleeding	LCA	UDCA	CDCA	DCA	CA	GLCA	GUDCA	GCDCA	GDCA	GCA	TLCA	TUDCA	TDCA	TCDCA	TCA	LCA	UDCA
标本	33	27	汉			1	62	34	12.7	11.9	0.8	159.2	54	34	202	12	211	6452	5.5	＞85.9			ICP重；NuA：2；早产；G1P1 35+5周	1	2	35	1	2560	1	0	0	200	8.85	6394.94	89.99	5.08	670.94	227.162	38088.2	22831.9	866.88	43452.2	55.3	30162.1	553.11	10864.9	33951.8	4.70186e-05	0.0339753
标本	34	27	汉			1	62	34	13.4	13	0.4	120.6	59	32	239	12	196	6172	5.2				ICP重；NuA：2；早产；G1P1 35+5周	1	2	35	1	2560	1	0	0	200	0.13	132.63	13.86	4.2	79.17	20.527	7877.27	7920.04	339.03	14216.1	12.3	4544.2	153.59	3358.99	11751.4	2.57817e-06	0.00263032
标本	35	27	汉	158	58	1	63	33	14.7	9.9	4.8	90.1	83	42	242	16	189	6592	6.1				ICP重；NuA：2；早产；G1P1 35+5周	1	2	35	1	2560	1	0	0	200	5.12	613.99	22.03	11.86	124.64	92.014	24209.9	20348.5	1387.17	38128.2	49.38	11538.5	534.7	7001.08	22414.5	4.04802e-05	0.00485438
标本	35	29	汉	165	75	0	65	32	19.3	14.7	4.6	44.8	78	58	299	115	722	3535			优思弗+易善复		ICP重，妊娠合并甲亢；GDM；IVF-ET术后，双胎（双绒双羊）G1P135+3周	1	2	35	1	1970/2380	1	0	0	300	51.42	13187.4	2303.37	97.31	3645.24	19.682	8446.67	4949.62	212.265	1344.75	3.63	1972.32	22.07	693.525	483.35	0.00137367	0.352297
标本	37	30	汉	155	64	1	67	36	16.1	7.5	8.6	22.6	354	144	241	49	253	6073	5.2				ICP重；妊娠合并亚甲减；NuA:2；G2P1 38周	2	2	38	0	3270		0	0	200	4.67	9.5	14.37	95	18.58	6.994	847.94	2531.38	737.25	6208.11	11.06	39.41	858.75	3443.81	13705.4	0.000163674	0.000332957
标本	37	27	汉	159	52	0	57	34	15.4	9.7	11.1	27.4	111	56	247	19	192	4204	3.3				ICP重，PROM；G1P137+5周	1	2	37	0	2840		0	0	200	5.55	12.15	12.61	74.06	7.91	7.228	280.45	2449.07	463.02	7124.31	24.18	32.87	1234.74	6908.14	28974.8	0.000116569	0.000255192
标本	24	22	汉	154	65	1	61	33	32	19.9	12.1	11.6	216	201	407	34	803	4823	2.3				ICP重；胎窘.早产；双胎妊娠（单绒双羊）；G2P2 34+5周	2	2	34	1		1	0	0	200	0	1.65	6.72	2.62	26.01	3.653	54.01	316.47	17.49	1070.52	0.13	34.59	79.36	2001.61	7112.08	0	0.000153819
标本	38	38	汉	158	60	1	71	40	39.4	23.9	15.5	48.2	342	268	245	231	866	6040					ICP重；瘢痕子宫前剖；	2	2	38	0	3280		0	0	200	0	3.36	61.5	17.44	543.4	3.965	45.87	1447.06	81.435	3145.15	0	23.82	203.43	5575.23	21236.7	0	0.000103741
标本	36	27	汉	159	53.5	1	70	38	9.2	7.5	1.7	43	208	342	299	59	217	4802	6.8		阿拓莫兰+思美泰		ICP重，G1P136+1周	1	2	36	1	2740	1	0	0	200	258.2	4610.99	266.98	472.29	587.28	158.847	7757.81	2619.55	2530.77	11258.7	65.72	3823.62	1576.98	1953.94	9983.65	0.00538755	0.096212
标本①	39	31	汉	155	63	0	64	35	26.6	17.2	9.4	28.6	90	73	383	109	404	5297	3.1				1.妊娠期肝内胆汁淤积症（重度）；2.妊娠合并甲状腺机能减退；2.瘢痕子宫（再次剖宫产）；3.盆腔炎性疾病后遗症；4.G6P240周孕剖宫产已产。	6	2	40	0	3310		1	0	200	3.32427	4.37474	15.8966	1.96986	218.174	2.49982	2760.57	4324.13	44.4661	11578.7	2.46928	27.0137	11.8178	2546.27	6914.89	0.000116819	0.000153734
标本②	40	31	汉	155	63	0	56	30	18	11.4	6.6	16.3	71	62	330	91	139	4641	12.1				1.妊娠期肝内胆汁淤积症（重度）；2.妊娠合并甲状腺机能减退；2.瘢痕子宫（再次剖宫产）；3.盆腔炎性疾病后遗症；4.G6P240周孕剖宫产已产。	6	2	40	0	3310		1	0	200	0	6.61128	17.1577	0.759989	277.819	2.09014	2472.27	2188.83	13.8236	7192.61	3.36571	5.73844	4.98622	1213.19	4422.82	0	0.00037096
标本①	26	27	汉			1	65	37	15.7	7.2	8.5	11.3	216	100	84	23	149	5363	2.2				1.妊娠期肝内胆汁淤积症（重度）；2.妊娠期糖尿病；3.早产；4.G1P136+4周孕剖宫产已产	1	2	36	1	2830		0	0	300	2.70316	6.95115	6.87662	86.8556	50.3145	10.3507	1495.28	1843.03	658.372	2534.9	8.76735	12.3064	419.204	1062.39	1530.88	0.00027784	0.000714464
标本①	40	29	汉	156	59.5	1	68	33	24.2	16.3	7.9	124.5	366	367	418	43	242	3981	7.9				1.妊娠期肝内胆汁淤积症（重度）2.G4P2 40+3周孕剖宫产已产	4	2	40	0	3180		0	0	200	0	10472.2	22.9249	20.1312	81.4005	3.6388	9341.21	7639.16	434.761	29699	4.71675	14975.6	1057.54	15860.8	69252.4	0	0.065919
标本②	38	29	汉	158	64	1	54	31	12.1	8.3	3.8	48.1	690	512	276	61	379	4950	5.9				1.妊娠期肝内胆汁淤积症（重度）；2.霉菌性阴道炎；3.G2P1 38+2周孕剖宫产已产	2	2	38	0	2720		0	0	300	12.2231	15.6918	16.0835	2.17287	4653.99	2.17134	1378.14	1832.87	1.03849	21032.2	5.11073	18.9831	5.54439	2856.29	20058.1	0.000235555	0.000302401
标本③	35	23	汉	160	64	0	72	42	30.2	11.8	18.4	13.8	276	205	197	60	545	5703			优思弗		1.妊娠期肝内胆汁淤积症（重型）；2.妊娠期糖尿病；3.妊娠合并血小板减少症；4.脐带绕颈一周；5.G1P136+1周孕剖宫产已产；6.早产。	1	2	36	1	2800		0	0	300	53.3265	3038.87	47.0264	393.906	51.1073	22.2714	3782.95	1660.11	656.526	1066.08	15.4843	381.462	143.84	423.874	277.357	0.00443863	0.25294
标本④	35	23	汉	160	64	0	65	42	33.6	28.8	4.8	13.3	262	274	187	62	241	5337	4.1		优思弗		1.妊娠期肝内胆汁淤积症（重型）；2.妊娠期糖尿病；3.妊娠合并血小板减少症；4.脐带绕颈一周；5.G1P136+1周孕剖宫产已产；6.早产。	1	2	36	1	2800		0	0	300	31.4129	3386.92	341.469	504.961	899.679	15.8235	4271.96	1000.45	504.23	998.218	5.37687	565.989	182.077	444.537	325.108	0.00233064	0.251288
标本1	37	30	汉	154	77	1	71	38	17	15.2	1.8	14.5	336	176	208	78	203	5063	8.8				1.重度妊娠期肝内胆汁淤积症 2.G2P137+4周孕剖宫产已产	2	2	34	1	3000		0	0	200	0	5.98798	27.6755	37.9701	265.67	2.6108	3372.4	4190.39	476.945	6502.91	6.25091	50.8494	250.933	2022.09	6195.5	0	0.000255807
标本4	37	33	汉			1	66	37	9.2	7.4	1.8	14.2	132	89	273	41	188	4840	4.8			有	ICP重；GDM，瘢痕子宫，羊水过多，G2P137+6周	2	2	37	0	2900		0	0	300	17.926	480.757	5.78817	45.2779	51.9653	6.61905	2616.9	959.656	128.533	2687.31	6.36905	1197.27	88.682	478.543	1537.03	0.00173893	0.0466363
标本1	39	33	汉	158	62	1	69	41	13.1	9.3	3.8	33.7	75	50	463	26	212	6722	4.9				G3P239+1周，ICP重	3	2	39	0	3300		0	0	200	2.54574	11.6167	112.825	145.109	1181.4	18.8625	2060.94	7054.46	2502.34	14862.5	4.25214	13.98	272.227	1158.64	2856.98	7.89165e-05	0.000360112
标本1	38	27	汉	169	80.6	1	66	38	10.3	9.4	0.9	55.9	294	190	134	55	194	6907	3.7		优思弗+思美泰		ICP重 NuA：1，G3P138+5周	3	2	38	0	3730		0	0	200	0.367113	12.7531	14.1632	34.6713	63.1341	6.61451	4790.76	7476.01	345.005	19667.2	14.3551	81.5563	409.566	7276.85	21602	5.94082e-06	0.000206378
标本1	40	33	汉	158	70	1	72	40	18.5	6	12.5	22	135	79	344	120	473	6607					ICP重；巨大儿；GDM，瘢痕子宫，G4P2 40+1周	4	2	40	0	4530		0	0	400	0	10.0555	28.3032	2.36069	170.936	2.85514	592.267	2826.17	10.4345	4262.43	4.07791	44.8139	3.95619	4418.91	8656.79	0	0.000478051
标本2	40	33	汉	158	70	1	64	36	10.7	7.3	3.4	26.4	100	57	302	107	169	6607	17.2				ICP重；巨大儿；GDM，瘢痕子宫，G4P2 40+1周	4	2	40	0	4530		0	0	400	0	10.8491	75.2958	2.12117	686.99	2.27192	594.002	2732.65	4.6593	5079.67	2.562	63.1117	88.328	5544.75	12930.4	0	0.00039001
标本1	39	28	汉	160	57	1	64	36	11.3	6.9	4.4	30.4	89	49	157	17	127	5739	5		优思弗+思美泰		ICP重，GDM，G1P1 39+1周	1	2	39	0	3710		0	0	200	30.142	2156.61	171.157	275.631	1565.78	86.4522	5908.9	4861.24	2040.51	6008.28	12.8854	739.752	316.145	1035.92	1229.16	0.00114008	0.0815705
标本1	35	26	汉	159	67	1	67	35	25	13	12	32	182	157	200	21	562	5390			优思弗+思美泰、阿拓莫兰		ICP重，G1P135+6周	1	2	35	1	2440		0	0	200	0	7.12076	9.33959	2.77028	30.6235	2.58622	2704.13	5372.36	74.4965	7357.08	5.58004	43.9724	81.7051	5741.46	10429	0	0.000223486
标本2	35	26	汉	159	67	1	64	36	18.7	16.2	2.5	100.3	202	205	183	20	206	5686	3.8		优思弗+思美泰、阿拓莫兰		ICP重，G1P135+6周	1	2	35	1	2440		0	0	200	0	5682.01	92.3811	6.84527	1197.2	6.3335	18356.1	11982.8	65.2297	19333.5	4.55352	9954.06	89.5173	12323.3	24453.9	0	0.0548733
标本1	38	36	汉	157	65	1	67	37	25.8	14.2	11.6	95.3	142	90	208	34	499	5055				有	1.ICP（重度）；2.瘢痕子宫（再次剖宫产）；4.G4P238周孕剖宫产已产	4	2	38	0	3280		0	0	300	5.05666	1.7879	12.386	10.1009	194.92	4.64013	1815.21	7227.51	129.003	17378.6	16.3641	35.1399	302.437	17791.2	55019.9	5.05948e-05	1.78889e-05
标本2	37	40	汉	162	63	0	65	33	18.7	6.9	11.8	41.5	246	116	188	47	634	3064					1.妊娠期肝内胆汁淤积症（重度）；2.妊娠期糖尿病；3.高龄初产；4.G4 P137+2周孕剖宫产已产	4	2	37	0	2630		1	0	200	14.6873	402.714	5.493	12.6654	51.0993	5.10344	4416.73	2809.2	117.963	3779.37	9.44023	4799.59	302.352	5051.08	10285.9	0.000458069	0.0125599
标本1	36	33	汉	158	65	1	65	32	16.2	14.2	2	56.3	106	81	327	35	181	5569	6.5				1.早产 2.妊娠期肝内胆汁淤积症（重度），3.瘢痕子宫（二次剖宫产） 4.盆腔炎性疾病后遗症 ，5.G5P2 36+4周剖宫产已产	5	2	36	1	2710	1	0	0	300	0.110269	2541.62	110.857	10.6019	2950.02	2.05156	5118.37	7145.16	156.736	16710.9	4.41092	590.482	27.6389	1591.54	3741.85	2.70915e-06	0.0624439
标本1	40	30	汉			1	66	36	28.7	19.8	8.9	46.2	462	196	152	55	189	5032	3.5		阿托莫兰 1.2g qd+多烯磷脂酰胆碱 465mg qd静滴，		1.妊娠期肝内胆汁淤积症（重度）；2.G2P140+5周孕剖宫产已产。	2	2	40	0	3370		1	0	200	3.80729	0.510414	5.54005	23.8886	180.594	1.6981	252.908	2972.52	168.778	7042.03	5.81522	6.71948	478.537	7094.27	22541.1	9.33647e-05	1.25167e-05
标本2	40	30	汉			1	64	36	33.3	20.2	13.1	67.8	524	224	158	56	569	4125			熊去氧胆酸 250mg bid 口服		1.妊娠期肝内胆汁淤积症（重度）；2.G2P140+5周孕剖宫产已产。	2	2	40	0	3370		1	0	200	4.70296	0	4.99441	25.521	168.736	2.49914	251.256	5255.07	244.532	9886.09	5.05159	187.215	630.648	11405.6	32139	7.8108e-05	0
标本3	40	30	汉			1	58	31	28.5	24.2	4.3	20.9	503	273	128	47	445	3703	2.4				1.妊娠期肝内胆汁淤积症（重度）；2.G2P140+5周孕剖宫产已产。	2	2	40	0	3370		1	0	200	4.18934	0.0270446	1.03586	2.28903	162.845	1.24686	140.629	916.733	20.4016	3593.11	1.76951	0	71.9789	2341.1	10272.3	0.000238986	1.54279e-06
标本4	术后4天	30	汉			1	58	30	22.1	17.3	4.8	34.8	435	191	134	44	327	3415	2.6				1.妊娠期肝内胆汁淤积症（重度）；2.G2P140+5周孕剖宫产已产。	2	2	40	0	3370		1	0	200	7.33993	322.948	30.4233	212.87	251.234	19.772	2828.45	3092	864.109	7311.79	14.9845	1329.37	443.78	2651.01	9234.11	0.000256514	0.0112863
标本1	35	35	汉	157	62	0	62	37	20.7	12.6	8.1	11.1	349	168	121	34	189	5452	2				1.妊娠期肝内胆汁淤积症（重度）；2.中央型前置胎盘；3.妊娠期糖尿病，4.胎盘植入；早产，高龄初产，8.G4P135+3周孕剖宫产	4	2	35	1	2520	1	0	0	400	17.1839	16.4025	34.2204	363.536	364.523	4.45783	1004.55	628.501	555.928	1540.37	10.1423	0	624.697	901.053	2666.51	0.0019679	0.00187842
标本4	36	29	汉	147	60	1	59	30	13.6	11.3	2.3	13.1	51	36	362	46	245	4787	6.5				1.双胎妊娠（单绒双羊、臀/头位）；2.妊娠期肝内胆汁淤积症 轻度；3.妊娠期合并子宫肌瘤；4.G1P136+1周孕剖宫产已产	1	2	36	1		1	0	0	300	1.65948	3.01964	3.95734	42.3541	35.1413	1.24044	632.406	1090.33	189.855	2428.16	2.1783	102.21	329.573	1570.37	4486.92	0.000151976	0.00027654
标本1	37	25	汉	161	52	1	66	36	37.7	36.8	0.9	44.9	336	296	258	76	235	5429	7.2		优思弗+思美泰+阿拓莫兰		1.妊娠期肝内胆汁淤积症（重度） ，2.GDM，3.G1P1 37+2周孕剖宫产已产	1	2	37	0	3550		1	0	200	0.511282	0.855744	4.7279	0	40.4533	1.34338	1751.53	2587.2	6.07604	5793.02	5.29659	3.16054	18.2163	9367.63	26501.8	1.10951e-05	1.85701e-05
标本1	37	28	汉	159	62	1	68	36	18.1	7	11.1	18.6	198	196	348	56	483	5467			腺苷蛋氨酸1#，bid		1.胎膜早破；2.妊娠期肝内胆汁淤积症；3.妊娠期糖尿病；4.瘢痕子宫（再次剖宫产）； 5.脐带绕腰1周；6.G2P237+4周孕剖宫产已产	2	2	37	0	3270		1	0	300	3.00678	6.22029	11.0499	31.9836	95.74	2.12855	425.032	2616.89	184.678	5107.28	2.49092	2.47115	115.896	1313.97	3316.1	0.000227185	0.00046999
标本1	38	27	汉	152	70	0	66	38	23.4	15.3	8.1	36.1	169	154	306	165	597	3512					1.妊娠期肝内胆汁淤积症（轻度） 2.G3P238+1周孕剖宫产已产。	3	2	38	0	3480		1	0	300	0	1.88999	9.53038	6.96451	140.707	1.29736	44.8067	1294.84	18.5441	2337.71	3.83499	11.7679	179.385	8757.92	18781	0	5.98284e-05
标本2	38	27	汉	152	70	0	63	35	15.5	15	0.5	33.2	134	131	313	149	212	3557	10.1				1.妊娠期肝内胆汁淤积症（轻度） 2.G3P238+1周孕剖宫产已产。	3	2	38	0	3480		1	0	300	0.418366	77.9121	10.697	11.6259	177.777	1.18599	858.803	1112.63	25.117	1749.44	4.04981	3968.08	161.085	6120.77	13254.8	1.51943e-05	0.00282963
标本1	34	30	汉			1	67	37	31.3	27.8	3.5	43.2	441	327	201	46	249	5058	6.6		优思弗1片 qid、思美泰1片 tid		1.妊娠期肝内胆汁淤积症（重度）2.绒毛膜羊膜炎？3.盆腔炎性疾病后遗症 4.脐带绕颈两周 5.甲状腺炎 6.早产 7.G2P135+5周孕剖宫产已产	2	2	35	1		1	0	0	200	2.81467	1.2189	3.01677	2.22637	42.9305	3.3705	226.524	5272.37	62.0563	10380.4	7.05991	3.64745	77.2281	5888.7	13001.6	8.04764e-05	3.48503e-05
标本2	35	30	汉	152	64	1	74	39	13.4	9.6	3.8	10.3	356	219	285	50	226	4900	8.3				1.妊娠期肝内胆汁淤积症（重度）2.绒毛膜羊膜炎？3.盆腔炎性疾病后遗症 4.脐带绕颈两周 5.甲状腺炎 6.早产 7.G2P135+5周孕剖宫产已产	2	2	35	1		1	0	0	200	0.865388	198.21	7.58112	2.27687	11.1693	1.72242	2334.88	1232.12	48.401	941.599	5.04464	734.971	33.693	623.175	818.84	0.000123723	0.0283378
标本3	35	30	汉			1	64	34	9.5	6.5	3	14.8	329	175	238	43	185	4219	6.8				1.妊娠期肝内胆汁淤积症（重度）2.绒毛膜羊膜炎？3.盆腔炎性疾病后遗症 4.脐带绕颈两周 5.甲状腺炎 6.早产 7.G2P135+5周孕剖宫产已产	2	2	35	1		1	0	0	200	5.29775	772.275	12.6807	43.894	13.2993	8.85216	3235.3	1057.54	96.5694	1163.82	4.69794	1476.47	47.3776	549.558	1087.6	0.000553276	0.0806534
标本4	35	30	汉			1	67	36	11.4	8.3	3.1	19.5	280	147	258	89	198	4330	8.6				1.妊娠期肝内胆汁淤积症（重度）2.绒毛膜羊膜炎？3.盆腔炎性疾病后遗症 4.脐带绕颈两周 5.甲状腺炎 6.早产 7.G2P135+5周孕剖宫产已产	2	2	35	1		1	0	0	200	7.16	725.27	15.11	32.08	22.06	9.72	4457.32	1524.12	185.93	2120.85	6.86	2516.22	126.02	1288.45	2125.14	0.000472224	0.0478337
标本5	术后2天	30	汉			1	58	31	32.2	26.8	5.4	17.7	238	118	207	66	243	3694	5.3				1.妊娠期肝内胆汁淤积症（重度）2.绒毛膜羊膜炎？3.盆腔炎性疾病后遗症 4.脐带绕颈两周 5.甲状腺炎 6.早产 7.G2P135+5周孕剖宫产已产	2	2	35	1		1	0	0	200	1.84	15.79	3.79	2.12	13.99	3.4	1680.93	1607.94	31.03	2909.44	1.49	938.58	92.36	1747.77	3147.29	0.000150847	0.0012945
标本6	术后3天	30	汉			1	60	31	18.7	14	4.7	20	229	118	201	65	229	3642	5				1.妊娠期肝内胆汁淤积症（重度）2.绒毛膜羊膜炎？3.盆腔炎性疾病后遗症 4.脐带绕颈两周 5.甲状腺炎 6.早产 7.G2P135+5周孕剖宫产已产	2	2	35	1		1	0	0	200	3.51	78.72	10.05	4.29	23.82	5.09	3004.79	1722.1	81.48	2670.9	5.99	2293.78	140.12	1554.03	2542.6	0.00024821	0.00556669
标本1	34	22	汉			0	58	35	13.9	8.9	5	35.8	146	146	112	20	134	5085	1.9		思美泰、还原型谷胱甘肽、熊去氧胆酸		1.妊娠期肝内胆汁淤积症（重度）2.脐带绕颈两周；3.G1P1 40+1周孕剖宫产已产。	1	2	40	0	2720		0	0	200	24.9146	10565.5	137.924	296.783	852.584	33.1805	5131.3	2663.24	870.712	3020.21	14.724	1399.56	376.098	1578.54	1917.03	0.000862623	0.365812
标本2	34	22	汉			0	64	40	12.6	7.1	5.5	15.6	122	100	131	21	150	5564	2.2				1.妊娠期肝内胆汁淤积症（重度）2.脐带绕颈两周；3.G1P1 40+1周孕剖宫产已产。	1	2	40	0	2720		0	0	200	13.1335	3741.2	49.7112	148.546	38.5776	3.90626	3407.04	1700.2	251.847	550.142	4.44186	963.151	116.479	539.176	343.645	0.00110633	0.315149
标本1	37	30	汉	155	68	1	71	40	15	12.6	2.4	51	272	129	204	65	242	6169	5.9		熊去氧胆酸250mg bid+腺苷蛋氨酸1g qd		1.妊娠期肝内胆汁淤积症（重度）；2.G2P1 37+6周孕剖宫产已产	2	2	37	0	3430		0	0	300	3.99389	4649.79	11.8922	19.0723	18.3904	1.98129	893.149	931.317	80.441	2430.21	18.0245	6095.31	596.689	5857.01	19481.5	9.72016e-05	0.113164
标本4	37	21	汉	155	58	1	67	36	29	23.9	5.1	39.5	272	244	237	40	205	6337	6.4		ICP重度治疗后优思弗 1片 bid思美泰 2 片 qd		1.妊娠期肝内胆汁淤积症（重度)；2.G3P1 37+1周孕剖宫产已产	3	2	37	0	2760		0	0	300	1.88172	6694.29	10.2573	31.5441	65.0129	2.97768	3394.48	2085.77	250.759	6259.57	2.69403	2999.12	252.05	1974.46	7339.65	5.99953e-05	0.213435
标本1	33	31	汉	156	75	1	55	27	17	13.2	3.8	16.5	54	31	244	39	219	3242	7.1				ICP重度，双胎（头/头，双绒双羊），瘢痕子宫，早产，G4P2 34+5周孕剖宫产已产	4	2	34	1		1	0	0	300	34.986	934.133	80.9655	319.186	213.671	27.1323	2383.76	1054.72	1092.74	1184.97	15.363	767.488	493.718	715.019	1445.77	0.00325039	0.0867862
标本3	34	31	汉	156	75	1	59	29	15.7	12.5	3.2	22.4	49	42	276	70	212	3689	12.8				ICP重度，双胎（头/头，双绒双羊），瘢痕子宫，早产，G4P2 34+5周孕剖宫产已产	4	2	34	1		1	0	0	300	23.07	1450.42	55.29	60.48	657.7	17.74	2453.22	1827.03	228.3	2213.09	15.37	1916.54	369.03	2564.19	4169.92	0.00128015	0.0804832
标本1	36	38	汉	156	64.5	1			27.6	16.8	10.8	51.1	300	187									1.妊娠期肝内胆汁淤积症（重度）2.Rh阴性血 3.瘢痕子宫 4.妊娠期糖尿病 5.妊娠合并血小板减少 6.妊娠合并子宫肌瘤 7.G5P237周孕剖宫产已产	5	2	37	0	3290		1	0	300	8.52	3.88	6.16	52.56	38.25	11.51	408.04	3845.99	410.08	9958.54	22.86	1953.34	1243.94	7099.51	22814.1	0.000177955	8.10405e-05
																																																0.000578627	0.0525095
																																															平均值	0.00057902	0.052509
																																															标准差	0.00111946	0.0955593
[truncated: 14 more columns]
